# Supplementary material
Source: ML conference proceedings conference paper supplement (https://proceedings.neurips.cc/paper_files/paper/2019/hash/46922a0880a8f11f8f69cbb52b1396be-Abstract.html)
Supplement: Supplementary file [file 46922a0880a8f11f8f69cbb52b1396be-Supplemental.zip]

345  
346  
347

## Supplementary materials for General Proximal Incremental Aggregated Gradient Algorithms: Better and Novel Results under General Scheme

348 **Lemma 5** Let  $\mathcal{F} = (\mathcal{F}^k)_{k \geq 0}$  be a sequence of sub-sigma algebras of  $\mathcal{F}$  such that  $\forall k \geq 0, \mathcal{F}^k \subset$   
349  $\mathcal{F}^{k+1}$ . Define  $\ell_+(\mathcal{F})$  as the set of sequences of  $[0, +\infty)$ -valued random variables  $(\xi_k)_{k \geq 0}$ , where  $\xi_k$   
350 is  $\mathcal{F}^k$  measurable, and  $\ell_+^1(\mathcal{F}) := \{(\xi_k)_{k \geq 0} \in \ell_+(\mathcal{F}) \mid \sum_k \xi_k < +\infty \text{ a.s.}\}$ . Let  $(\alpha_k)_{k \geq 0}, (v_k)_{k \geq 0} \in$   
351  $\ell_+(\mathcal{F})$ , and  $(\eta_k)_{k \geq 0}, (\xi_k)_{k \geq 0} \in \ell_+^1(\mathcal{F})$  be such that

$$\mathbb{E}(\alpha_{k+1} | \mathcal{F}^k) + v_k \leq (1 + \xi_k)\alpha_k + \eta_k.$$

352 Then  $(v_k)_{k \geq 0} \in \ell_+^1(\mathcal{F})$  and  $\alpha_k$  converges to a  $[0, +\infty)$ -valued random variable a.s..

### 353 Proof of Lemma 1

354 Updating  $x^{k+1}$  directly gives

$$\frac{x^k - x^{k+1}}{\gamma} - v^k \in \partial g(x^{k+1}). \quad (18)$$

355 With the convexity of  $g$ , we have

$$g(x^{k+1}) - g(x^k) \leq \left\langle \frac{\Delta^k}{\gamma} + v^k, -\Delta^k \right\rangle \quad (19)$$

356 With Lipschitz continuity of  $\nabla f$ ,

$$f(x^{k+1}) - f(x^k) \leq \langle \nabla f(x^k), \Delta^k \rangle + \frac{L}{2} \|\Delta^k\|^2. \quad (20)$$

357 Combining (19) and (20),

$$\begin{aligned} F(x^{k+1}) - F(x^k) &\stackrel{(19)+(20)}{\leq} \langle \nabla f(x^k) - v^k, \Delta^k \rangle + \left(\frac{L}{2} - \frac{1}{\gamma}\right) \|\Delta^k\|^2 \\ &= \underbrace{\langle \nabla f(x^k) - \sum_{i=1}^m \nabla f_i(x^{k-\tau_{i,k}}), \Delta^k \rangle}_I + \left(\frac{L}{2} - \frac{1}{\gamma}\right) \|\Delta^k\|^2 + \underbrace{\langle \sum_{i=1}^m \nabla f_i(x^{k-\tau_{i,k}}) - v^k, \Delta^k \rangle}_{II}. \end{aligned} \quad (21)$$

358 In the following, we give bounds of  $I, II$  (or expectation). By Cauchy's inequality with  $\delta$ ,

$$II \leq \frac{\|v^k - \sum_{i=1}^m \nabla f_i(x^{k-\tau_{i,k}})\|^2}{2\delta} + \frac{\delta}{2} \|\Delta^k\|^2. \quad (22)$$

359 On the other hand,

$$\begin{aligned} I &\stackrel{a)}{\leq} \sum_{i=1}^m L_i \|x^k - x^{k-\tau_{i,k}}\| \cdot \|\Delta^k\| \\ &\stackrel{b)}{\leq} \sum_{i=1}^m L_i \left( \sum_{d=k-\tau}^{k-1} \|\Delta^d\| \right) \cdot \|\Delta^k\| \\ &\stackrel{c)}{\leq} L \sum_{d=k-\tau}^{k-1} \|\Delta^d\| \cdot \|\Delta^k\| \\ &\stackrel{d)}{\leq} \frac{L}{2\varepsilon} \sum_{d=k-\tau}^{k-1} \|\Delta^d\|^2 + \frac{\tau\varepsilon L}{2} \|\Delta^k\|^2. \end{aligned} \quad (23)$$

360 where  $a)$  depends on the Lipschitz continuity of  $\nabla f_i$ ,  $b)$  is obtained from the inequality  $\|x^k -$   
361  $x^{k-\tau_{i,k}}\| \leq \sum_{d=k-\tau_{i,k}}^{k-1} \|\Delta^d\| \leq \sum_{d=k-\tau}^{k-1} \|\Delta^d\|$ ,  $c)$  is due to the fact  $L = \sum_{i=1}^m L_i$ , and  $d)$  uses

362 Cauchy's inequality with  $\varepsilon \|\Delta^d\| \cdot \|\Delta^k\| \leq \frac{1}{2\varepsilon} \|\Delta^d\|^2 + \frac{\varepsilon}{2} \|\Delta^k\|^2$ . Combining (21), (22) and (23) and  
 363 taking conditional expectation over  $\chi^k$ , we have

$$\begin{aligned} \mathbb{E}(F(x^{k+1}) \mid \chi^k) - F(x^k) &\leq \frac{L}{2\varepsilon} \sum_{d=k-\tau}^{k-1} \|\Delta^d\|^2 \\ &\quad + \left[ \frac{(\tau\varepsilon + 1)L}{2} - \frac{1}{\gamma} + \frac{\delta}{2} \right] \mathbb{E}(\|\Delta^k\|^2 \mid \chi^k) + \frac{\sigma_k^2}{2\delta}. \end{aligned} \quad (24)$$

If  $\gamma < \frac{2}{(2\tau+1)L}$ , we can choose  $\varepsilon, \delta > 0$  such that

$$\varepsilon + \frac{1}{\varepsilon} = 1 + \frac{1}{\tau} \left( \frac{1}{\gamma L} - \frac{1}{2} \right), \delta = \frac{1}{2} \left( \frac{1}{\gamma} - \frac{L}{2} - \tau L \right)$$

364 Then, with direct calculations and substitutions, we have:

$$\begin{aligned} \xi_k(\varepsilon, \delta) - \mathbb{E}(\xi_{k+1}(\varepsilon, \delta) \mid \chi^k) &\stackrel{(4)}{=} F(x^k) - \mathbb{E}(F(x^{k+1}) \mid \chi^k) \\ &\quad + \frac{L}{2\varepsilon} \sum_{d=k-\tau}^{k-1} (d - (k - \tau) + 1) \|\Delta^d\|^2 \\ &\quad - \frac{L}{2\varepsilon} \sum_{d=k+1-\tau}^{k-1} (d - (k - \tau)) \|\Delta^d\|^2 - \frac{L}{2\varepsilon} \tau \mathbb{E}(\|\Delta^k\|^2 \mid \chi^k) + \frac{\sigma_k^2}{2\delta} \\ &\stackrel{c)}{=} F(x^k) - \mathbb{E}(F(x^{k+1}) \mid \chi^k) + \frac{L}{2\varepsilon} \sum_{d=k-\tau}^{k-1} \|\Delta^d\|^2 - \frac{L}{2\varepsilon} \tau \mathbb{E}(\|\Delta^k\|^2 \mid \chi^k) + \frac{\sigma_k^2}{2\delta} \\ &\stackrel{(24)}{\geq} \frac{1}{4} \left( \frac{1}{\gamma} - \frac{L}{2} - \tau L \right) \cdot \mathbb{E}(\|\Delta^k\|^2 \mid \chi^k), \end{aligned} \quad (25)$$

365 where c) follows from  $(d - (k - \tau) + 1) \|\Delta^d\|^2 - (d - (k - \tau)) \|\Delta^d\|^2 = \|\Delta^d\|^2$ . Taking expectation on  
 366 both sides of (25), we then prove the result. Therefore we have  $\mathbb{E}\|\Delta^k\|^2 \in \ell^1$  by using a telescoping  
 367 sum<sup>1</sup>.

### 368 **Proof of Theorem 1**

369 Obviously, we have

$$(x^k - x^{k+1})/\gamma - v^k \in \partial g(x^{k+1}). \quad (26)$$

370 That means

$$(x^k - x^{k+1})/\gamma + \nabla f(x^{k+1}) - v^k \in \nabla f(x^{k+1}) + \partial g(x^{k+1}) = \partial F(x^{k+1}). \quad (27)$$

371 Thus, we have

$$\begin{aligned} \mathbb{E}[\text{dist}(\mathbf{0}, \partial F(x^{k+1}))] \\ &\leq \mathbb{E}\|(x^k - x^{k+1})/\gamma + \nabla f(x^{k+1}) - \sum_{i=1}^m \nabla f_i(x^{k-\tau_{i,k}}) + \sum_{i=1}^m \nabla f_i(x^{k-\tau_{i,k}}) - v^k\| \\ &\leq \mathbb{E}\|\Delta^k\|/\gamma + L \sum_{d=k-\tau}^k \mathbb{E}\|\Delta^d\| + \sigma_k. \end{aligned} \quad (28)$$

372 Taking the limitation  $k \rightarrow +\infty$  and with Lemma 1, the result is then proved.

### 373 **Proof of Theorem 2**

374 Since  $0 < \gamma < \frac{2}{2\tau+1}$ , we can choose  $\varepsilon, \delta > 0$  such that

$$\varepsilon + \frac{1}{\varepsilon} = 1 + \frac{1}{\tau} \left( \frac{1}{\gamma} - \frac{1}{2} \right), \delta = \frac{L}{4\tau} \left( \frac{1}{\gamma} - \frac{1}{2} - \tau \right). \quad (29)$$

---

<sup>1</sup>We say a sequence  $a^k$  is in  $\ell^1$  if  $\sum_{k=1}^{\infty} |a^k| < \infty$ .

375 With direct computations, we have

$$\begin{aligned}
& \hat{\xi}_k(\varepsilon, \delta) - \mathbb{E}[\hat{\xi}_k(\varepsilon, \delta) \mid \chi^k] + \frac{\delta}{2} \mathbb{E}(\|\Delta^k\|^2 \mid \chi^k) \\
& \stackrel{a)}{\geq} F(x^k) - \mathbb{E}[F(x^{k+1}) \mid \chi^k] + \kappa \sum_{d=k-\tau}^{k-1} (d - (k - \tau) + 1) \mathbb{E}\|\Delta^d\|^2 \\
& \quad - \kappa \sum_{d=k+1-\tau}^{k-1} (d - (k - \tau)) \mathbb{E}\|\Delta^d\|^2 - \kappa \tau \mathbb{E}\|\Delta^k\|^2 + \frac{\sigma_k^2}{2\delta} + \frac{\delta}{2} \mathbb{E}(\|\Delta^k\|^2 \mid \chi^k) \\
& = F(x^k) - \mathbb{E}[F(x^{k+1}) \mid \chi^k] + \sum_{d=k-\tau}^{k-1} \kappa \|\Delta^d\|^2 \\
& \quad - \kappa \tau \mathbb{E}(\|\Delta^k\|^2 \mid \chi^k) + \frac{\sigma_k^2}{2\delta} + \frac{\delta}{2} \mathbb{E}(\|\Delta^k\|^2 \mid \chi^k) \\
& \stackrel{b)}{\geq} (\kappa - \frac{L}{2\varepsilon}) \cdot (\sum_{d=k-\tau}^{k-1} \|\Delta^d\|^2) + \left[ \frac{1}{\gamma} - \frac{(\tau\varepsilon + 1)L}{2} - \kappa\tau \right] \mathbb{E}(\|\Delta^k\|^2 \mid \chi^k) \\
& \stackrel{c)}{=} \frac{1}{4\tau} (\frac{1}{\gamma} - \frac{L}{2} - \tau L) \cdot (\sum_{d=k-\tau}^{k-1} \|\Delta^d\|^2) + \frac{1}{4} (\frac{1}{\gamma} - \frac{L}{2} - \tau L) \cdot \mathbb{E}(\|\Delta^k\|^2 \mid \chi^k) \\
& \stackrel{d)}{\geq} \frac{1}{4\tau} (\frac{1}{\gamma} - \frac{L}{2} - \tau L) \cdot (\sum_{d=k-\tau}^{k-1} \|\Delta^d\|^2) + \frac{1}{4\tau} (\frac{1}{\gamma} - \frac{L}{2} - \tau L) \cdot \mathbb{E}(\|\Delta^k\|^2 \mid \chi^k) \\
& = \frac{1}{4\tau} (\frac{1}{\gamma} - \frac{L}{2} - \tau L) \cdot (\sum_{d=k-\tau}^{k-1} \|\Delta^d\|^2) + \frac{\delta}{2} \mathbb{E}(\|\Delta^k\|^2 \mid \chi^k), \tag{30}
\end{aligned}$$

376 where a) follows from the definition  $\hat{\xi}_k(\varepsilon, \delta)$ , b) is from (24), c) is a direct computation using (7) and  
377 (29), d) is due to that  $\mathbb{E}(\|\Delta^k\|^2 \mid \chi^k) \geq 0$ . Applying Lemma (5) to (30), we then have

$$\lim_k \|\Delta^k\| = 0, a.s. \tag{31}$$

378 Using the deterministic form of (28), we then prove the result.

### 379 **Proof of Theorem 3**

380 Consider an auxiliary function

$$P(y_1, y_2, \dots, y_{\tau+1}) = F(y_{\tau+1}) + \frac{L}{2\varepsilon} \sum_{d=1}^{\tau} d \|y_{d+1} - y_d\|^2 \tag{32}$$

381 and auxiliary point

$$y^k := (x^{k-\tau}, x^{k-\tau+1}, \dots, x^k), \tag{33}$$

382 where  $\varepsilon$  is given as the same way in Lemma 1. It is easy to see that  $P$  is also semi-algebraic. With  
383 (25), we can see that

$$P(y^k) - P(y^{k+1}) \geq \frac{1}{4} (\frac{1}{\gamma} - \frac{L}{2} - \tau L) \cdot \|x^{k+1} - x^k\|^2 - \frac{\sigma_k^2}{2\delta}. \tag{34}$$

384 On the other hand, with direct calculations and (28),

$$\text{dist}(\mathbf{0}, \partial P(y^{k+1})) \leq \|x^k - x^{k+1}\|/\gamma + L(\tau + 1) \sum_{d=k-\tau}^k \|x^{d+1} - x^d\| + \sigma_k \tag{35}$$

Thus, [(1.6), [26]] is satisfied, and with [Theorem 1, [26]],  $\sum_k \|x^{k+1} - x^k\| < +\infty$ . Then,  $\sum_k \|y^{k+1} - y^k\| < +\infty$ ; that means the sequence  $(y^k)_{k \geq 0}$  is convergent. Using (35),  $(y^k)_{k \geq 0}$  converges to some critical point of  $P$ , we denote as  $y^* = (y_1^*, y_2^*, \dots, y_{\tau+1}^*)$ . Noting  $\text{dist}(\mathbf{0}, \partial P(y^*)) = 0$ , then  $y_1^* = y_2^* = \dots = y_{\tau+1}^*$  and

$$0 = \text{dist}(\mathbf{0}, \partial F(y_1^*)) = \text{dist}(\mathbf{0}, \partial F(y_2^*)) = \dots = \text{dist}(\mathbf{0}, \partial F(y_{\tau+1}^*)).$$

385 Thus,  $(x^k)_{k \geq 0}$  converges to  $y_1^* (= y_2^* = \dots = y_{\tau+1}^*)$  which is a critical point of  $F$ .

386 **Proof of Proposition 1**

387 We just need to prove that there exist  $\varepsilon, \delta > 0$  such that

$$\mathbb{E}\xi_k(\varepsilon, \delta) - \mathbb{E}\xi_{k+1}(\varepsilon, \delta) \geq \left(\frac{1}{8\gamma} - \frac{L}{8} - \frac{\tau L}{4}\right) \cdot \mathbb{E}\|\Delta^k\|^2, \quad \lim_k \mathbb{E}\|\Delta^k\| = 0. \quad (36)$$

388 Updating  $x^{k+1}$  directly gives

$$x^{k+1} \in \arg \min_y \left\{ \frac{1}{2} \|x^k - \gamma v^k - y\|^2 + \gamma g(y) \right\}, \quad (37)$$

389 which directly yields

$$\frac{1}{2} \|x^k - \gamma v^k - x^{k+1}\|^2 + \gamma g(x^{k+1}) \leq \frac{1}{2} \|\gamma v^k\|^2 + \gamma g(x^k). \quad (38)$$

390 After simplification, we have

$$\frac{1}{2\gamma} \|x^k - x^{k+1}\|^2 + g(x^{k+1}) \leq \langle v^k, x^k - x^{k+1} \rangle + g(x^k). \quad (39)$$

391 With Lipschitz continuity of  $\nabla f$ ,

$$f(x^{k+1}) - f(x^k) \leq \langle -\nabla f(x^k), x^k - x^{k+1} \rangle + \frac{L}{2} \|x^{k+1} - x^k\|^2. \quad (40)$$

392 Combining (39) and (40),

$$\begin{aligned} F(x^{k+1}) - F(x^k) &\stackrel{(39)+(40)}{\leq} \langle \nabla f(x^k) - v^k, \Delta^k \rangle + \left(\frac{L}{2} - \frac{1}{2\gamma}\right) \|\Delta^k\|^2 \\ &= \underbrace{\langle \nabla f(x^k) - \sum_{i=1}^m \nabla f_i(x^{k-\tau_{i,k}}), \Delta^k \rangle}_{I} + \left(\frac{L}{2} - \frac{1}{2\gamma}\right) \|\Delta^k\|^2 \\ &\quad + \underbrace{\langle \sum_{i=1}^m \nabla f_i(x^{k-\tau_{i,k}}) - v^k, \Delta^k \rangle}_{II} \end{aligned} \quad (41)$$

393 The terms I and II has been bounded in Lemma 1. With the bounds and taking conditional expectation  
394 over  $\chi^k$ ,

$$\begin{aligned} \mathbb{E}(F(x^{k+1}) \mid \chi^k) - F(x^k) &\leq \frac{L}{2\varepsilon} \sum_{d=k-\tau}^{k-1} \|\Delta^d\|^2 \\ &\quad + \left[ \frac{(\tau\varepsilon + 1)L}{2} - \frac{1}{2\gamma} + \frac{t}{2} \right] \mathbb{E}(\|\Delta^k\|^2 \mid \chi^k) + \frac{\sigma_k^2}{2t}. \end{aligned} \quad (42)$$

If  $0 < \gamma < \frac{1}{(2\tau+1)L}$ , we can choose  $\varepsilon, t > 0$  such that

$$\varepsilon + \frac{1}{\varepsilon} = 1 + \frac{1}{\tau} \left( \frac{1}{2\gamma L} - \frac{1}{2} \right), t = \frac{1}{2} \left( \frac{1}{2\gamma} - \frac{L}{2} - \tau L \right).$$

395 Then, with direct calculations and substitutions, we have:

$$\begin{aligned} \xi_k(\varepsilon) - \mathbb{E}(\xi_{k+1}(\varepsilon) \mid \chi^k) &\stackrel{(4)}{=} F(x^k) - \mathbb{E}(F(x^{k+1}) \mid \chi^k) + \frac{L}{2\varepsilon} \sum_{d=k-\tau}^{k-1} (d - (k - \tau) + 1) \|\Delta^d\|^2 \\ &\quad - \frac{L}{2\varepsilon} \sum_{d=k+1-\tau}^{k-1} (d - (k - \tau)) \|\Delta^d\|^2 - \frac{L}{2\varepsilon} \tau \mathbb{E}(\|\Delta^k\|^2 \mid \chi^k) + \frac{\sigma_k^2}{2t} \\ &\stackrel{c)}{=} F(x^k) - \mathbb{E}(F(x^{k+1}) \mid \chi^k) + \frac{L}{2\varepsilon} \sum_{d=k-\tau}^{k-1} \|\Delta^d\|^2 - \frac{L}{2\varepsilon} \tau \mathbb{E}(\|\Delta^k\|^2 \mid \chi^k) + \frac{\sigma_k^2}{2t} \\ &\stackrel{(38)}{\geq} \frac{1}{4} \left( \frac{1}{2\gamma} - \frac{L}{2} - \tau L \right) \cdot \mathbb{E}(\|\Delta^k\|^2 \mid \chi^k), \end{aligned} \quad (43)$$

396 where c) follows from  $(d - (k - \tau) + 1) \|\Delta^d\|^2 - (d - (k - \tau)) \|\Delta^d\|^2 = \|\Delta^d\|^2$ . With taking  
397 expectations on both sides of (43), we then prove the result.

398 **Proof of Lemma 2**

399 Sketch of the proof: The proof consists of two steps. First, we prove

$$\mathbb{E}F_k(\varepsilon, \delta) - \mathbb{E}F_{k+1}(\varepsilon, \delta) \geq \min\left\{\frac{L}{8\tau}\left(\frac{1}{\gamma} - \frac{1}{2} - \tau\right), 1\right\} \cdot \left(\sum_{d=k-\tau}^k \mathbb{E}\|\Delta^d\|^2 + \phi_k^2\right), \quad (44)$$

400 Second, we prove

$$\begin{aligned} (\mathbb{E}F_{k+1}(\varepsilon, \delta))^2 &\leq \max\left\{\frac{1}{\gamma} + L + \kappa\tau, 2D\right\} \cdot \left(\sum_{d=k-\tau}^k \mathbb{E}\|\Delta^d\|^2 + \phi_k^2\right) \\ &\quad \cdot \left( [(\tau+1)\left(\frac{1}{\gamma} + L\right) + 1]\mathbb{E}\|x^{k+1} - \overline{x^{k+1}}\|^2 + \kappa\tau \sum_{d=k-\tau}^{k-1} \mathbb{E}\|\Delta^d\|^2 + \lambda_k \right). \end{aligned} \quad (45)$$

401 Combining (44) and (45) gives us the claim in the lemma.

402 **Proof of (44)**

403 Since  $0 < \gamma < \frac{2}{(2\tau+1)L}$ , we can choose  $\varepsilon, \delta > 0$  such that

$$\varepsilon + \frac{1}{\varepsilon} = 1 + \frac{1}{\tau}\left(\frac{1}{\gamma L} - \frac{1}{2}\right), \delta = \frac{1}{4\tau}\left(\frac{1}{\gamma} - \frac{L}{2} - \tau L\right). \quad (46)$$

404 Direct subtraction of  $F_k$  and  $F_{k+1}$  yields:

$$\begin{aligned} \mathbb{E}[F_k(\varepsilon, t) - F_{k+1}(\varepsilon, t)] &\stackrel{a)}{\geq} \mathbb{E}F(x^k) - \mathbb{E}F(x^{k+1}) + \kappa \sum_{d=k-\tau}^{k-1} (d - (k - \tau) + 1) \mathbb{E}\|\Delta^d\|^2 \\ &\quad - \kappa \sum_{d=k+1-\tau}^{k-1} (d - (k - \tau)) \mathbb{E}\|\Delta^d\|^2 - \kappa\tau \mathbb{E}\|\Delta^k\|^2 + \frac{\sigma_k^2}{2\delta} + \phi_k^2 \\ &= \mathbb{E}F(x^k) - \mathbb{E}F(x^{k+1}) + \sum_{d=k-\tau}^{k-1} \kappa \mathbb{E}\|\Delta^d\|^2 - \kappa\tau \mathbb{E}\|\Delta^k\|^2 + \frac{\sigma_k^2}{2\delta} + \phi_k^2 \\ &\stackrel{b)}{\geq} \left(\kappa - \frac{L}{2\varepsilon}\right) \cdot \left(\sum_{d=k-\tau}^{k-1} \mathbb{E}\|\Delta^d\|^2\right) + \left[\frac{1}{\gamma} - \frac{(\tau\varepsilon + 1)L}{2} - \kappa\tau\right] \mathbb{E}\|\Delta^k\|^2 - \frac{\delta}{2} \mathbb{E}\|\Delta^k\|^2 + \phi_k^2 \\ &\stackrel{c)}{=} \frac{1}{4\tau}\left(\frac{1}{\gamma} - \frac{L}{2} - \tau L\right) \cdot \left(\sum_{d=k-\tau}^{k-1} \mathbb{E}\|\Delta^d\|^2\right) + \frac{1}{4}\left(\frac{1}{\gamma} - \frac{L}{2} - \tau L\right) \cdot \mathbb{E}\|\Delta^k\|^2 - \frac{\delta}{2} \mathbb{E}\|\Delta^k\|^2 + \phi_k^2 \\ &\stackrel{d)}{\geq} \frac{1}{4\tau}\left(\frac{1}{\gamma} - \frac{L}{2} - \tau L\right) \cdot \left(\sum_{d=k-\tau}^{k-1} \mathbb{E}\|\Delta^d\|^2\right) + \frac{1}{4\tau}\left(\frac{1}{\gamma} - \frac{L}{2} - \tau L\right) \cdot \mathbb{E}\|\Delta^k\|^2 - \frac{\delta}{2} \mathbb{E}\|\Delta^k\|^2 + \phi_k^2 \\ &= \min\left\{\frac{1}{8\tau}\left(\frac{1}{\gamma} - \frac{L}{2} - \tau L\right), 1\right\} \cdot \left(\sum_{d=k-\tau}^k \mathbb{E}\|\Delta^d\|^2 + \phi_k^2\right), \end{aligned} \quad (47)$$

405 where a) follows from the definition  $F_k$ , b) from taking expectation on both sides of (24), c) is a  
406 direct computation using definition of  $\lambda_k$ , d) is due to  $\tau \geq 1$ .

407 **Proof of (45)**

408 The convexity of  $g$  yields

$$g(x^{k+1}) - g(\overline{x^{k+1}}) \leq \langle \widetilde{\nabla}g(x^{k+1}), x^{k+1} - \overline{x^{k+1}} \rangle, \quad (48)$$

409 where  $\widetilde{\nabla}g(x^{k+1}) \in \partial g(x^{k+1})$  is arbitrary. With (18), we then have

$$g(x^{k+1}) - g(\overline{x^{k+1}}) \leq \left\langle \frac{x^k - x^{k+1}}{\gamma} - v^k, x^{k+1} - \overline{x^{k+1}} \right\rangle. \quad (49)$$

410 Similarly, we have

$$f(x^{k+1}) - f(\overline{x^{k+1}}) \leq \langle \nabla f(x^{k+1}), x^{k+1} - \overline{x^{k+1}} \rangle. \quad (50)$$

411 Summing (49) and (50) yields

$$\begin{aligned} F(x^{k+1}) - F(\overline{x^{k+1}}) &\leq \sum_{i=1}^m \langle \nabla f_i(x^{k+1}) - \nabla f_i(x^{k-\tau_{i,k}}), x^{k+1} - \overline{x^{k+1}} \rangle \\ &\quad + \langle \frac{x^k - x^{k+1}}{\gamma}, x^{k+1} - \overline{x^{k+1}} \rangle + \langle \sum_{i=1}^m \nabla f_i(x^{k-\tau_{i,k}}) - v^k, x^{k+1} - \overline{x^{k+1}} \rangle \\ &\stackrel{a)}{\leq} \sum_{i=1}^m L_i \|x^{k+1} - x^{k-\tau_{i,k}}\| \cdot \|x^{k+1} - \overline{x^{k+1}}\| \\ &\quad + \langle \frac{x^k - x^{k+1}}{\gamma}, x^{k+1} - \overline{x^{k+1}} \rangle + \langle \sum_{i=1}^m \nabla f_i(x^{k-\tau_{i,k}}) - v^k, x^{k+1} - \overline{x^{k+1}} \rangle \\ &\stackrel{b)}{\leq} \sum_{i=1}^m L_i \left( \sum_{d=k-\tau}^k \|\Delta^d\| \right) \cdot \|x^{k+1} - \overline{x^{k+1}}\| + \frac{\|\Delta^k\|}{\gamma} \cdot \|x^{k+1} - \overline{x^{k+1}}\| \\ &\quad + \langle \sum_{i=1}^m \nabla f_i(x^{k-\tau_{i,k}}) - v^k, x^{k+1} - \overline{x^{k+1}} \rangle \\ &\stackrel{c)}{=} \sum_{d=k-\tau}^k L \|\Delta^d\| \cdot \|x^{k+1} - \overline{x^{k+1}}\| + \frac{\|\Delta^k\|}{\gamma} \cdot \|x^{k+1} - \overline{x^{k+1}}\| \\ &\quad + \langle \sum_{i=1}^m \nabla f_i(x^{k-\tau_{i,k}}) - v^k, x^{k+1} - \overline{x^{k+1}} \rangle, \end{aligned} \quad (51)$$

412 where  $a)$  is due to the Lipschitz continuity of  $\nabla_i f_i$ ,  $b)$  depends on the fact  $\|x^{k+1} - x^{k-\tau_{i,k}}\| \leq$   
 413  $\sum_{d=k-\tau}^k \|\Delta^d\|$ , and  $L = \sum_{i=1}^m L_i$ . With (8) and (51), we have

$$\begin{aligned} F_{k+1}(\varepsilon, t) &\leq \sum_{d=k-\tau}^{k-1} L \|\Delta^d\| \cdot \|x^{k+1} - \overline{x^{k+1}}\| + \left(\frac{1}{\gamma} + L\right) \|\Delta^k\| \cdot \|x^{k+1} - \overline{x^{k+1}}\| \\ &\quad + \kappa \cdot \sum_{d=k+1-\tau}^k (d - (k - \tau)) \|\Delta^d\|^2 + \langle \sum_{i=1}^m \nabla f_i(x^{k-\tau_{i,k}}) - v^k, x^{k+1} - \overline{x^{k+1}} \rangle + \lambda_k \\ &\stackrel{a)}{\leq} \sum_{d=k-\tau}^{k-1} L \|\Delta^d\| \cdot \|x^{k+1} - \overline{x^{k+1}}\| + \left(\frac{1}{\gamma} + L\right) \|\Delta^k\| \cdot \|x^{k+1} - \overline{x^{k+1}}\| + \kappa \tau \cdot \sum_{d=k-\tau+1}^k \|\Delta^d\|^2 \\ &\quad + \left\| \sum_{i=1}^m \nabla f_i(x^{k-\tau_{i,k}}) - v^k \right\| \cdot \|x^{k+1} - \overline{x^{k+1}}\| + \lambda_k, \end{aligned} \quad (52)$$

414 where  $a)$  is from that  $d - (k - \tau) \leq \tau$  when  $k - \tau + 1 \leq d \leq k$ . Let

$$a^k := \begin{pmatrix} \sqrt{\frac{1}{\gamma} + L} \|\Delta^k\| \\ \sqrt{L} \|\Delta^{k-1}\| \\ \vdots \\ \sqrt{L} \|\Delta^{k-\tau}\| \\ \sqrt{\kappa \tau} \|\Delta^k\| \\ \vdots \\ \sqrt{\kappa \tau} \|\Delta^{k-\tau+1}\| \\ \left\| \sum_{i=1}^m \nabla f_i(x^{k-\tau_{i,k}}) - v^k \right\| \\ \sqrt{\lambda_k} \end{pmatrix}, \quad b^k := \begin{pmatrix} \sqrt{\frac{1}{\gamma} + L} \|x^{k+1} - \overline{x^{k+1}}\| \\ \sqrt{L} \|x^{k+1} - \overline{x^{k+1}}\| \\ \vdots \\ \sqrt{L} \|x^{k+1} - \overline{x^{k+1}}\| \\ \sqrt{\kappa \tau} \|\Delta^k\| \\ \vdots \\ \sqrt{\kappa \tau} \|\Delta^{k-\tau+1}\| \\ \|x^{k+1} - \overline{x^{k+1}}\| \\ \sqrt{\lambda_k} \end{pmatrix}. \quad (53)$$

415 Using this and the definition of  $F_k$  (8), we have:

$$(\mathbb{E}F_{k+1}(\varepsilon, t))^2 \leq \mathbb{E}[F_{k+1}(\varepsilon, t)^2] \leq \mathbb{E}|\langle a^k, b^k \rangle|^2 \leq \mathbb{E}\|a^k\|^2 \mathbb{E}\|b^k\|^2. \quad (54)$$

416 Direct calculation yields

$$\mathbb{E}\|a^k\|^2 \leq \max\left\{\frac{1}{\gamma} + L + \kappa\tau, 2D\right\} \cdot \left(\sum_{d=k-\tau}^k \mathbb{E}\|\Delta^d\|^2 + \phi_k^2\right) \quad (55)$$

417 and

$$\mathbb{E}\|b^k\|^2 \leq [(\tau + 1)\left(\frac{1}{\gamma} + L\right) + 1]\mathbb{E}\|x^{k+1} - \overline{x^{k+1}}\|^2 + \kappa\tau \sum_{d=k-\tau}^{k-1} \mathbb{E}\|\Delta^d\|^2 + \lambda_k. \quad (56)$$

418 Thus, we prove the result.

#### 419 **Proof of Theorem 4**

For a given  $C > 0$ , we set

$$\phi^k := \frac{C}{\sqrt{2\delta}} \zeta^k.$$

420 If  $C$  is large enough, we have  $\frac{\sigma_k}{\sqrt{2\delta}} \leq \phi_k$ . Thus, for any  $k$

$$\frac{\sum_{i=k}^{+\infty} \phi_i^2}{\phi_k^2} = \frac{1}{1 - \zeta^2}. \quad (57)$$

421 Therefore, Lemma 2 holds. It is easy to see that  $\alpha(\kappa\tau \sum_{d=k-\tau}^{k-1} \mathbb{E}\|\Delta^d\|^2 + \beta\mathbb{E}\|x^{k+1} - \overline{x^{k+1}}\|^2 + \lambda_k)$   
422 is bounded; and we assume the bound is  $R$ , i.e.,

$$\alpha(\kappa\tau \sum_{d=k-\tau}^{k-1} \mathbb{E}\|\Delta^d\|^2 + \beta\mathbb{E}\|x^{k+1} - \overline{x^{k+1}}\|^2 + \lambda_k) \leq R. \quad (58)$$

423 With Lemma 2, we then have

$$[\mathbb{E}F_{k+1}(\varepsilon, \delta)]^2 \leq R \cdot (\mathbb{E}F_k(\varepsilon, \delta) - \mathbb{E}F_{k+1}(\varepsilon, \delta)). \quad (59)$$

424 From [Lemma 3.8, [2]] and the fact  $\mathbb{E}F(x^k) - \min F \leq \mathbb{E}F_k(\varepsilon, \delta)$ , we then prove the result.

#### 425 **Proof of Proposition 4**

426 In the deterministic case, Lemma 1 can hold without expectations,  $\sup_k \{\xi_k(\varepsilon, t)\} < +\infty$ , thus,  
427  $\sup_k \{F(x^k)\} < +\infty$  and  $\sum_{d=k-\tau}^{k-1} \|\Delta^d\|^2 < +\infty$ . Noting the coercivity of  $F$ , sequences  $(x^k)_{k \geq 0}$   
428 and  $(\overline{x^k})_{k \geq 0}$  are bounded. Thus,  $\left(\alpha(\kappa\tau \sum_{d=k-\tau}^{k-1} \|\Delta^d\|^2 + \beta\|x^{k+1} - \overline{x^{k+1}}\|^2 + \frac{\lambda_k^2}{\phi_k^2})\right)_{k \geq \tau}$  is bound-  
429 ed; and we assume the bound is  $R$ , i.e.,

$$\alpha(\kappa\tau \sum_{d=k-\tau}^{k-1} \|\Delta^d\|^2 + \beta\|x^{k+1} - \overline{x^{k+1}}\|^2 + \lambda_k) \leq R. \quad (60)$$

430 In the deterministic case, Lemma 2 can hold with deleting the expectation, we then have

$$F_{k+1}(\varepsilon, t)^2 \leq R(F_k(\varepsilon, t) - F_{k+1}(\varepsilon, t)). \quad (61)$$

431 From [Lemma 3.8, [2]] and the fact  $F(x^k) - \min F \leq F_k(\varepsilon, t)$ , we then prove the result.

#### 432 **Proof of Theorem 5**

433 With (12), we have

$$\alpha\beta\mathbb{E}\|x^{k+1} - \overline{x^{k+1}}\|^2 \leq \frac{\alpha\beta}{\nu}(\mathbb{E}F(x^{k+1}) - \min F) \leq \frac{\alpha\beta}{\nu}F_{k+1}(\varepsilon, \delta) \leq \frac{\alpha\beta}{\nu}\mathbb{E}F_k(\varepsilon, \delta). \quad (62)$$

434 On the other hand, from the definition of (8),

$$\alpha\kappa\tau \sum_{d=k-\tau}^{k-1} \mathbb{E}\|\Delta^d\|^2 \leq \alpha\tau \mathbb{E}F_k(\varepsilon, \delta) \quad (63)$$

435 and

$$\alpha\lambda_k \leq \alpha\mathbb{E}F_k(\varepsilon, \delta). \quad (64)$$

436 Letting  $H = \alpha\tau + \frac{\alpha\beta}{\nu} + \alpha$  and with Lemma 2,

$$[\mathbb{E}F_{k+1}(\varepsilon, \delta)]^2 \leq H(\mathbb{E}F_k(\varepsilon, \delta) - \mathbb{E}F_{k+1}(\varepsilon, \delta)) \cdot \mathbb{E}F_k(\varepsilon, \delta). \quad (65)$$

437 If  $\mathbb{E}F_k(\varepsilon, \delta) = 0$ , we have  $0 = \mathbb{E}F_{k+1}(\varepsilon, \delta) = \mathbb{E}F_{k+2}(\varepsilon, \delta) = \dots$ . The result certainly holds. If  
438  $\mathbb{E}F_k(\varepsilon, \delta) \neq 0$ ,

$$\left(\frac{\mathbb{E}F_{k+1}(\varepsilon, \delta)}{\mathbb{E}F_k(\varepsilon, \delta)}\right)^2 + H\left(\frac{\mathbb{E}F_{k+1}(\varepsilon, \delta)}{\mathbb{E}F_k(\varepsilon, \delta)}\right) - H \leq 0. \quad (66)$$

439 With basic algebraic computation,

$$\frac{\mathbb{E}F_{k+1}(\varepsilon, \delta)}{\mathbb{E}F_k(\varepsilon, \delta)} \leq \frac{2H}{\sqrt{H^2 + 4H} + H}. \quad (67)$$

440 By defining  $\omega = \frac{2H}{\sqrt{H^2 + 4H} + H}$ , we then prove the result.

### 441 **Proof of Lemma 3**

442 1) If  $\eta_k = \frac{2c}{(2\tau+1)L}$ , we then have

$$F(x^{k+1}) - F(x^k) \leq \frac{L}{2\varepsilon} \sum_{d=k-\tau}^{k-1} \|\Delta^d\|^2 + \left[ \frac{(\tau\varepsilon + 1)L}{2} - \frac{(2\tau + 1)L}{2c} \right] \|\Delta^k\|^2. \quad (68)$$

443 2) If the  $\eta_k \geq \frac{2c}{(2\tau+1)L}$ , with the Lipschitz continuity of  $\nabla f$ , we have

$$\begin{aligned} F(x^{k+1}) - F(x^k) &\leq \langle \nabla f(x^k), x^{k+1} - x^k \rangle + g(x^{k+1}) - g(x^k) \\ &= \underbrace{\left\langle \sum_{i=1}^m \nabla f_i(x^{k-\tau_{i,k}}), x^{k+1} - x^k \right\rangle + g(x^{k+1}) - g(x^k)}_{\dagger} \\ &\quad + \langle \nabla f(x^k) - \sum_{i=1}^m \nabla f_i(x^{k-\tau_{i,k}}), \Delta^k \rangle + \frac{L}{2} \|\Delta^k\|^2. \end{aligned} \quad (69)$$

444 Based on the line search rule,  $\dagger \leq -\frac{c_2}{2} \|x^{k+1} - x^k\|^2$ , thus,

$$\begin{aligned} F(x^{k+1}) - F(x^k) &\leq \langle \nabla f(x^k) - \sum_{i=1}^m \nabla f_i(x^{k-\tau_{i,k}}), \Delta^k \rangle + \frac{L - c_2}{2} \|\Delta^k\|^2 \\ &\stackrel{a)}{\leq} \|\nabla f(x^k) - \sum_{i=1}^m \nabla f_i(x^{k-\tau_{i,k}})\| \cdot \|\Delta^k\| + \frac{L - c_2}{2} \|\Delta^k\|^2 \\ &\stackrel{b)}{\leq} \left( L \sum_{d=k-\tau}^{k-1} \|\Delta^d\| \right) \cdot (\|\Delta^k\|) + \frac{L - c_2}{2} \|\Delta^k\|^2 \\ &\stackrel{c)}{\leq} \frac{(\tau\varepsilon + 1)L}{2} \|\Delta^k\|^2 + \frac{L}{2\varepsilon} \sum_{d=k-\tau}^{k-1} \|\Delta^d\|^2 - \frac{c_2}{2} \|\Delta^k\|^2, \end{aligned} \quad (70)$$

445 where a) is from the Cauchy inequality, b) is the triangle inequality, c) uses the Schwarz inequality.

By setting

$$\frac{1}{\varepsilon} + \varepsilon = 1 + \frac{1}{\tau} \left( \frac{2\tau + 1}{2c} - \frac{1}{2} \right),$$



446 with direct computation, for both case,

$$\xi_k(\varepsilon) - \xi_{k+1}(\varepsilon) \geq \frac{1-c}{4c}(L + 2\tau L) \cdot \|\Delta^k\|^2. \quad (71)$$

447 That means

$$\lim_k \|\Delta^k\| = 0. \quad (72)$$

448 Noting that (28) still holds here. With (72) and (28), we then derive the result.
